# Supplementary material
Source: publisher figshare collection journal article supplement (https://future-science-group.figshare.com/ndownloader/files/30751858)
Supplement: Supplementary file 1 [file 30751858]

**A****Amplification Plot**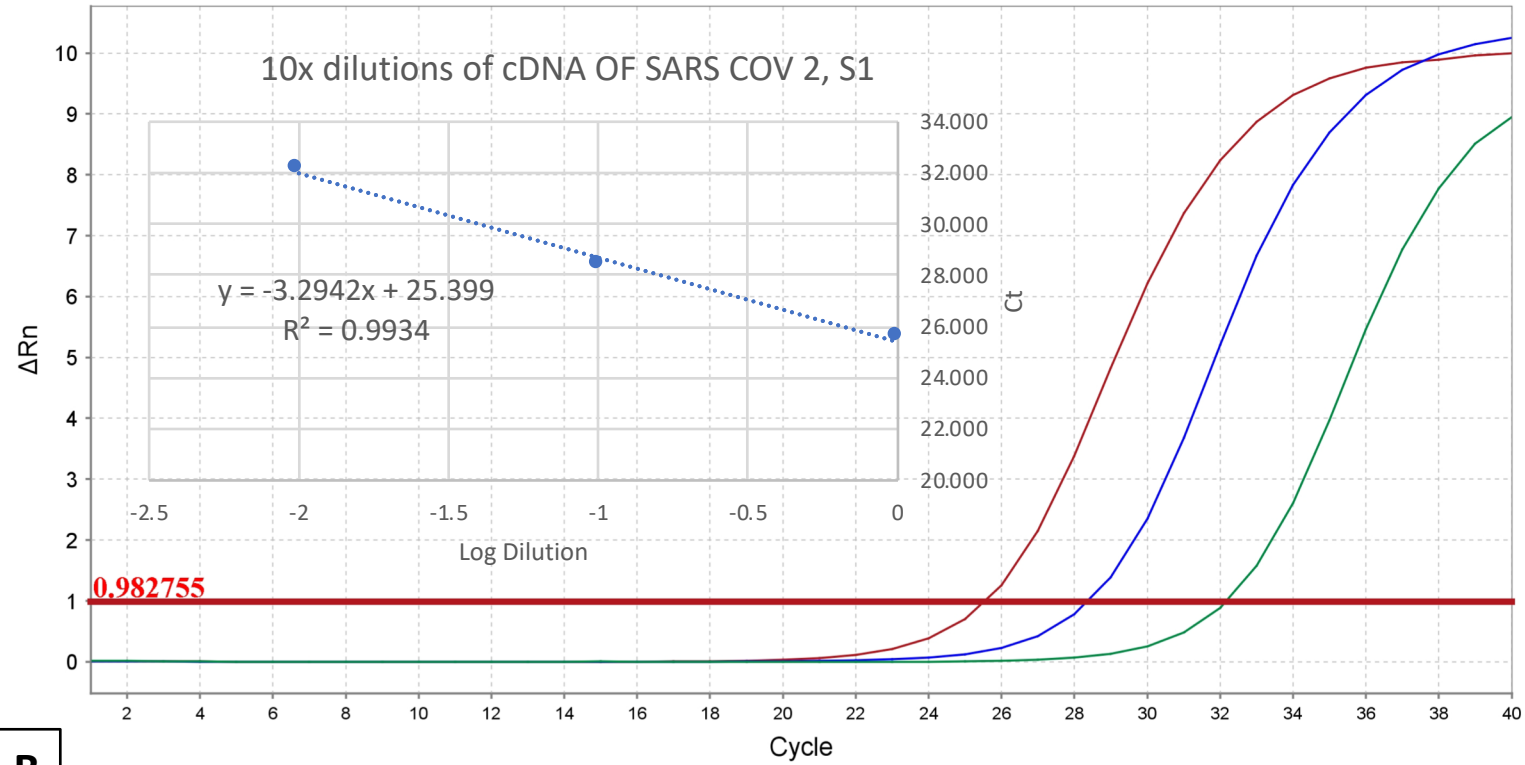**B****Melt Curve Plot**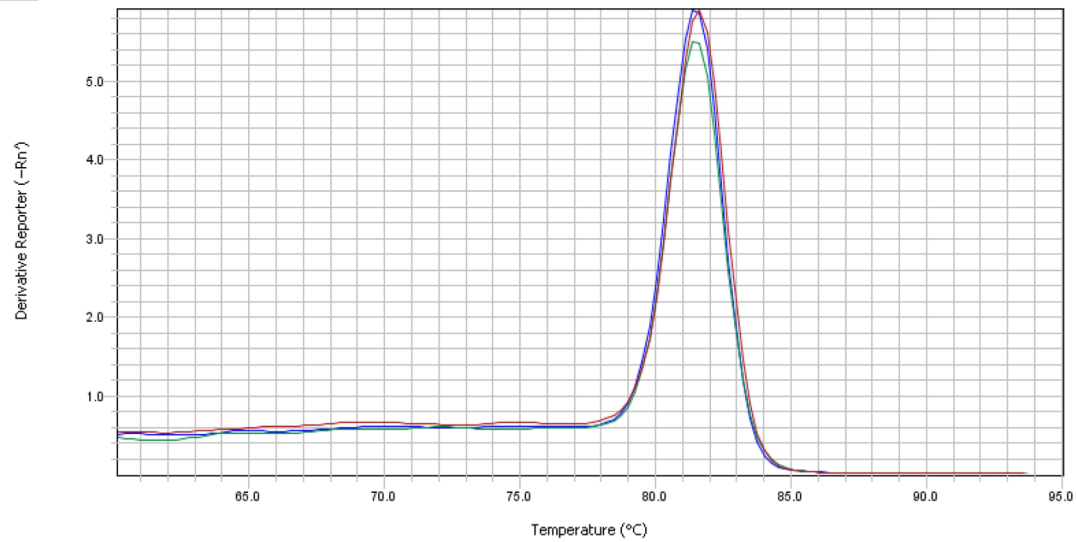

### **Figure S6**

**Efficiency of D-B primers in detecting SARS-COV-2 virus in nasopharyngeal swabs.** cDNA of reverse-transcribed RNA extracted from nasopharyngeal swabs of patient S1 underwent 3 decimal dilutions and subjected to qPCR with SYBR green kit+ UDG and D-B primer mix #8. (A) amplification plot and insert efficiency plot of Ct vs log dilution. Slope= -3.2942 representing 101.27% amplification efficiency and  $R^2= 0.9934$ . (B) melt curve of the amplicons depicted in panel A. qPCR was performed under standard conditions.
